# Supplementary material for: Synthesis of tapered tetragonal nanorods of anatase TiO2with enhanced photocatalytic activity via a sol–hydrothermal process mediated by H2O2and NH3
Source: Royal Society of Chemistry journal article supplement (doi:10.1039/c5ta02396c), 2015-01-01
Supplement: c5ta02396c1.pdf [file c5ta02396c1.pdf]

## Electronic Supplementary Information

### Synthesis of tapered tetragonal nanorods of anatase TiO<sub>2</sub> with enhanced photocatalytic activity via a sol-hydrothermal process mediated by H<sub>2</sub>O<sub>2</sub> and NH<sub>3</sub>

Linlin Zhang,<sup>a,b</sup> Long Tian,<sup>a</sup> Yongxin Liu,<sup>a,b</sup> Taixing Tan,<sup>a,b</sup> Dan Liu<sup>a</sup> and Cheng Wang<sup>\*a</sup>

<sup>a</sup> State Key Laboratory of Rare Earth Resource Utilization, Changchun Institute of Applied Chemistry, Chinese Academy of Sciences, Changchun, Jilin 130022, P. R. China. Fax: 86-431-85698041; Tel: 86-431-85262770; E-mail: cwang@ciac.ac.cn

<sup>b</sup> University of Chinese Academy of Sciences, Beijing 100049, P. R. China.

**Table S1** Summary of experiments carried out to investigate the effects of the volume of H<sub>2</sub>O<sub>2</sub> and NH<sub>3</sub>. All these experiments were performed with 20 mg of Ti powder under 200 °C for 24 h.

| H <sub>2</sub> O <sub>2</sub> /mL | NH <sub>3</sub> /mL | H <sub>2</sub> O/mL | Entry |
|-----------------------------------|---------------------|---------------------|-------|
|                                   | 1                   | 12                  | a     |
|                                   | 3                   | 10                  | b     |
| 2                                 | 5                   | 8                   | c     |
|                                   | 7                   | 6                   | d     |
|                                   | 8                   | 5                   | e     |
|                                   | 1                   | 11                  | f     |
|                                   | 3                   | 9                   | g     |
| 3                                 | 5                   | 7                   | h     |
|                                   | 7                   | 5                   | i     |
|                                   | 9                   | 3                   | j     |
|                                   | 1                   | 9                   | k     |
|                                   | 3                   | 7                   | l     |
| 5                                 | 5                   | 5                   | m     |
|                                   | 7                   | 3                   | n     |
|                                   | 9                   | 1                   | o     |
|                                   | 1                   | 7                   | p     |
| 7                                 | 3                   | 5                   | q     |
|                                   | 5                   | 3                   | r     |
|                                   | 7                   | 1                   | s     |
|                                   | 1                   | 5                   | t     |
| 9                                 | 3                   | 3                   | u     |
|                                   | 5                   | 1                   | v     |

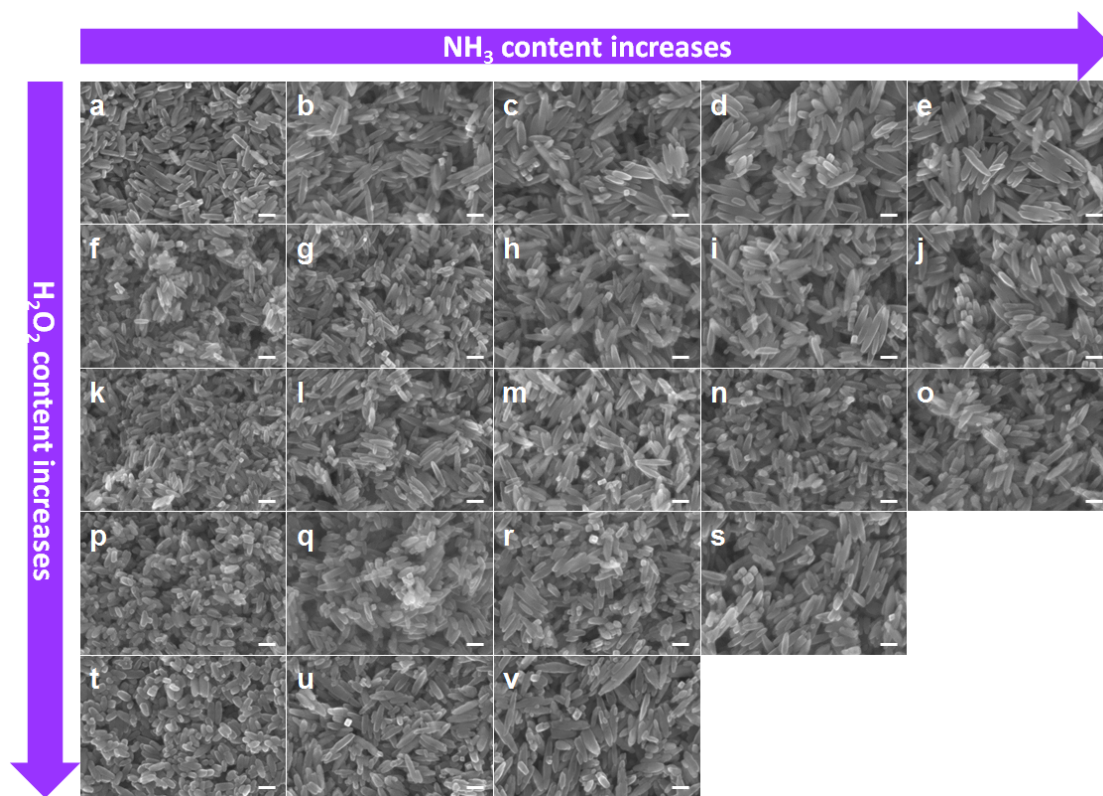

**Fig. S1** SEM images of the synthesized nanocrystals showing shape evolution with contents of  $\text{H}_2\text{O}_2$  and  $\text{NH}_3$ . The detailed synthetic conditions corresponding to each image are displayed in Table S1. All the scale bars are 100 nm.

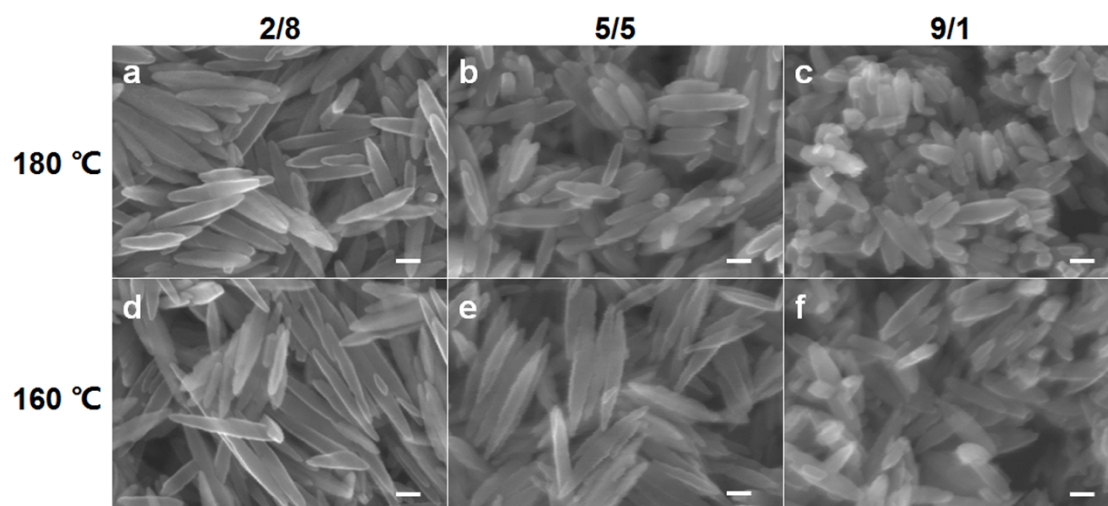

**Fig. S2** SEM images of nanocrystals synthesized with different volume ratios of  $\text{H}_2\text{O}_2$  to  $\text{NH}_3$  ( $x/y$ ) for 24 h at varied reaction temperatures. For  $x/y = 2/8$ : a, 180 °C; d, 160 °C. For  $x/y = 5/5$ : b, 180 °C; e, 160 °C. For  $x/y = 9/1$ : c, 180 °C; f, 160 °C. All the scale bars are 60 nm.

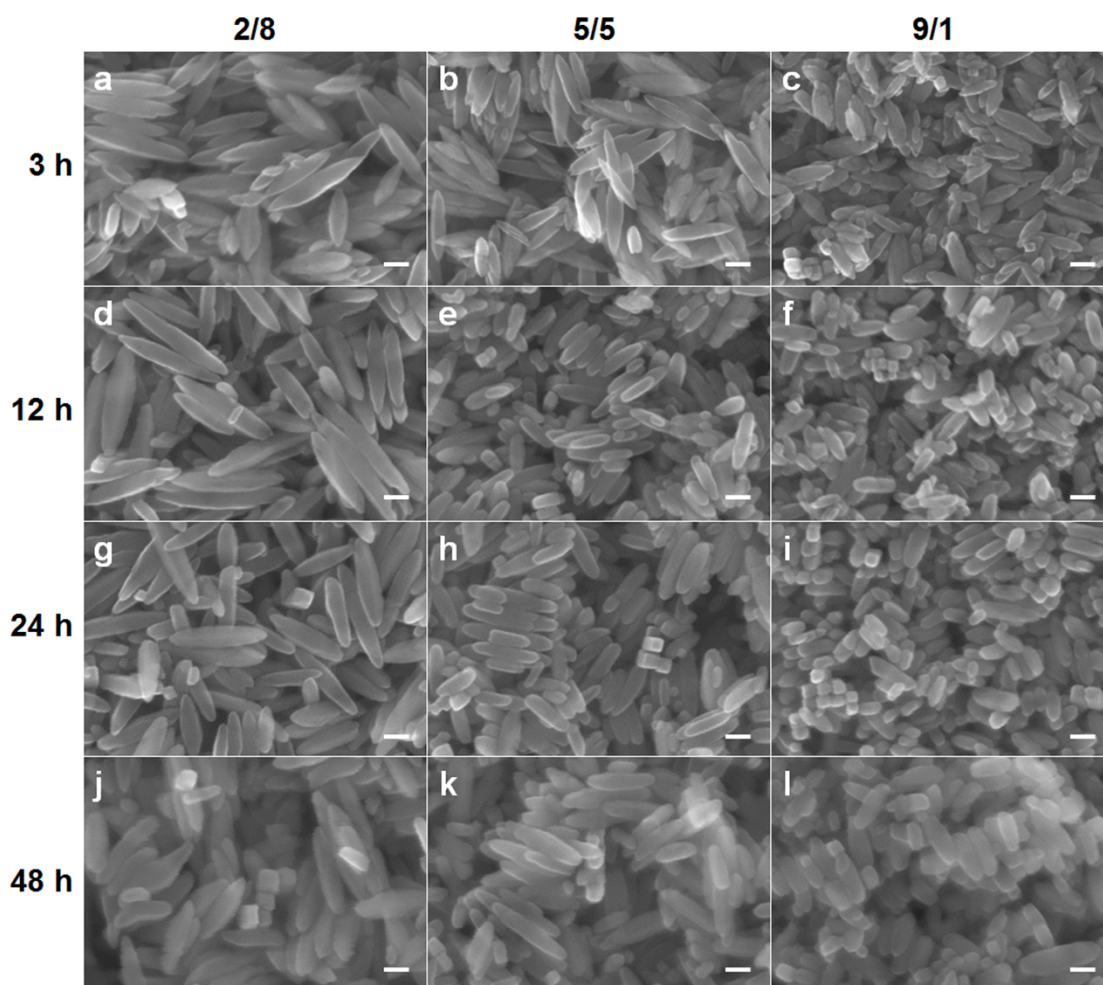

**Fig. S3** SEM images of nanocrystals synthesized with different volume ratios of  $\text{H}_2\text{O}_2$  to  $\text{NH}_3$  ( $x/y$ ) at  $200^\circ\text{C}$  for different reaction durations. For  $x/y = 2/8$ : a, 3 h; d, 12 h; g, 24 h; j, 48 h. For  $x/y = 5/5$ : b, 3 h; e, 12 h; h, 24 h; k, 48 h. For  $x/y = 9/1$ : c, 3 h; f, 12 h; i, 24 h; l, 48 h. All the scale bars are 60 nm.

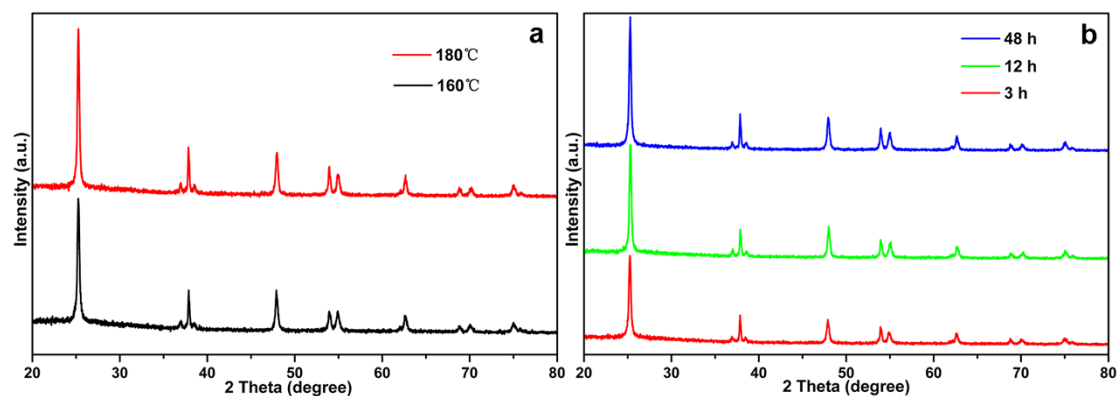

**Fig. S4** XRD patterns of samples synthesized with 9 mL of  $\text{H}_2\text{O}_2$  and 1 mL of  $\text{NH}_3$  at varied reaction temperatures for 24 h (a) and at  $200^\circ\text{C}$  for different reaction durations (b).

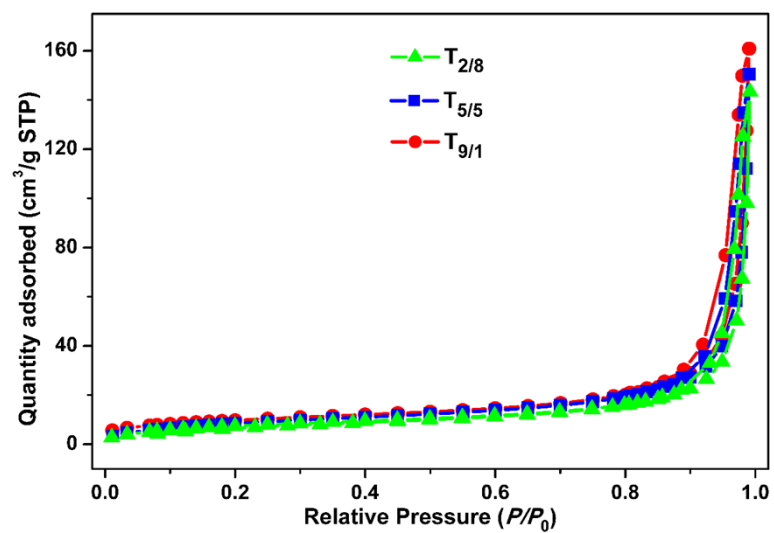

**Fig. S5** N<sub>2</sub> adsorption-desorption isotherm curves of the samples of T<sub>2/8</sub>, T<sub>5/5</sub> and T<sub>9/1</sub>.

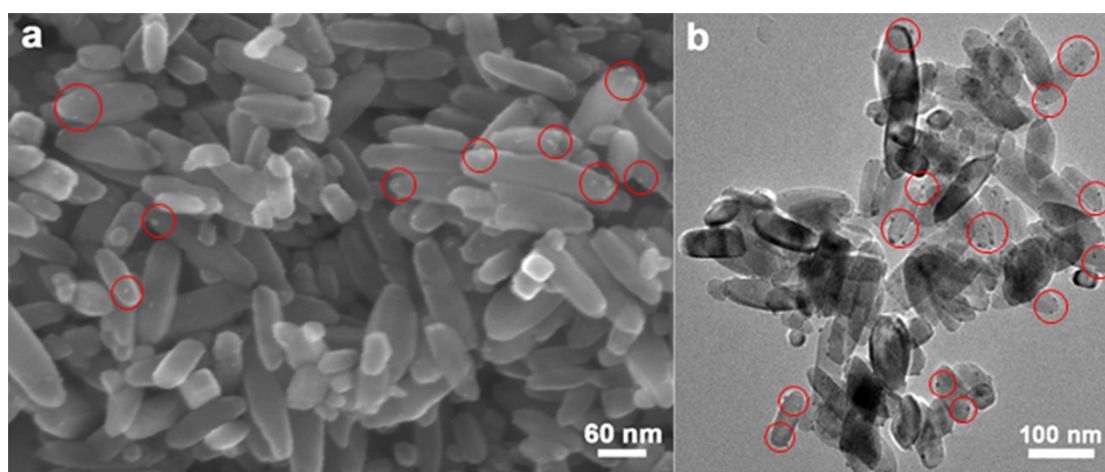

**Fig. S6** SEM (a) and TEM (b) images of anatase TiO<sub>2</sub> nanorods (T<sub>9/1</sub>) loaded with Pt nanoparticles under UV light irradiation. The red circles indicate the locations of Pt nanoparticles.

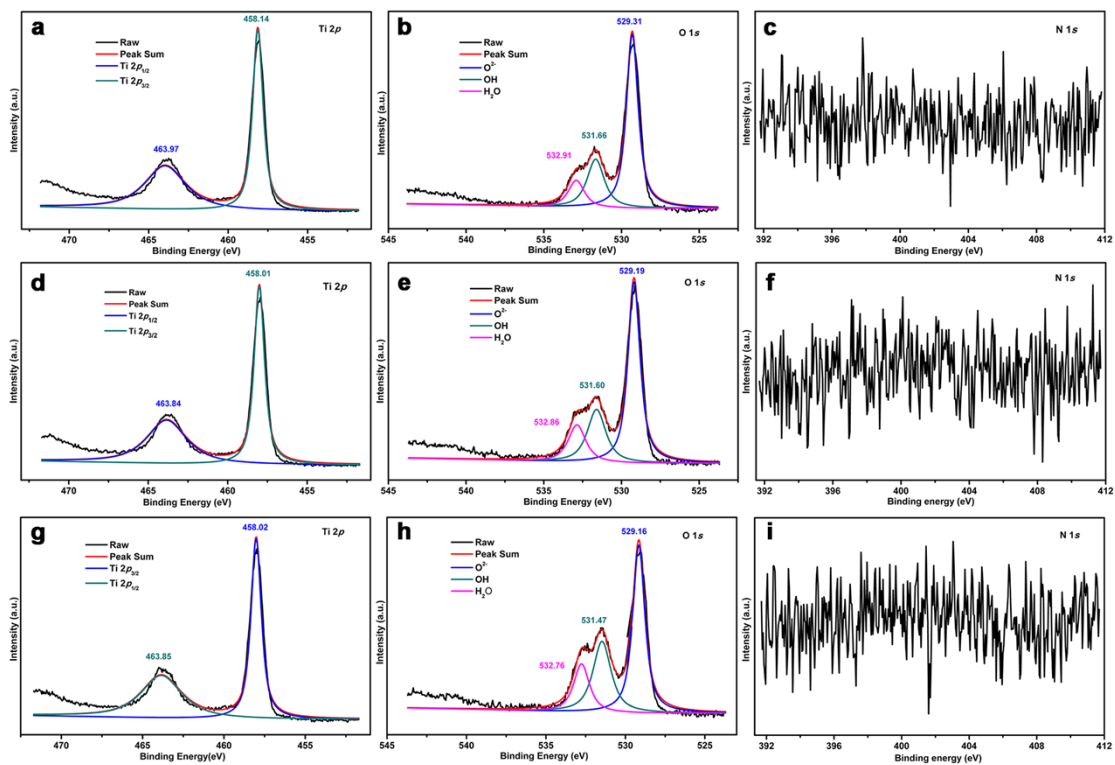

**Fig. S7** Ti 2*p*, O 1*s* and N 1*s* X-ray photoelectron spectra (XPS) corresponding to samples of T<sub>2/8</sub> (a, b and c), T<sub>5/5</sub> (d, e and f) and T<sub>9/1</sub> (g, h and i).

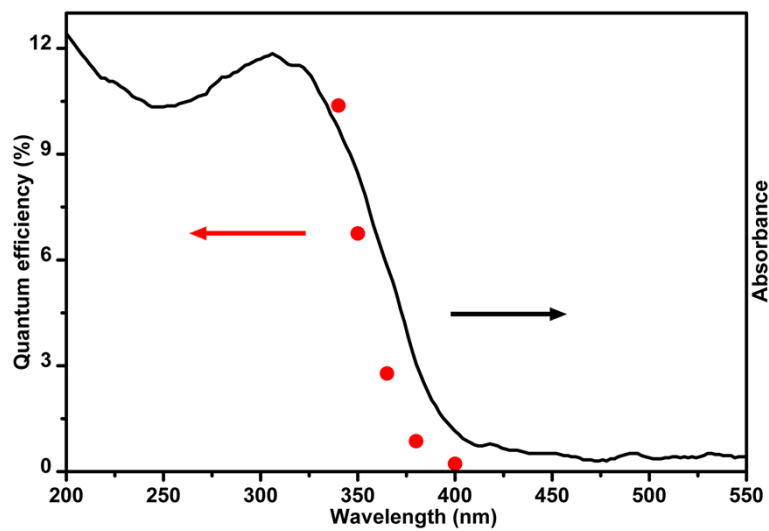

**Fig. S8** Action spectrum of H<sub>2</sub> evolution for sample of T<sub>5/5</sub>, showing quantum efficiency variation with wavelength of incident light and the corresponding UV-visible absorption spectrum.
